# Supplementary material for: On the non-classical contribution in lone-pair–π interaction: IQA perspective
Source: Royal Society of Chemistry journal article supplement (doi:10.1039/c5cp04489h), 2015-01-01
Supplement: c5cp04489h1.pdf [file c5cp04489h1.pdf]

## On the Non-Classical Contribution in Lone Pair- $\pi$ Interaction: IQA perspective

**Zahra Badri<sup>[a]\*</sup>, Cina Foroutan-Nejad<sup>[a]</sup>, Jiri Kozelka<sup>[b,c]</sup>, Radek Marek<sup>[a,d]\*</sup>**

<sup>a</sup> CEITEC – Central European Institute of Technology, Masaryk University, Kamenice 5/A4, CZ-625 00, Brno, Czech Republic

<sup>b</sup> Université Paris Descartes, UMR 8601 CNRS, 45, rue des Saints-Pères, 75270 Paris, France

<sup>c</sup> Department of Condensed Matter Physics, Faculty of Science, Masaryk University Kotlářská 2, CZ-611 37 Brno, Czech Republic

<sup>d</sup> Department of Chemistry, Faculty of Science, Masaryk University, Kamenice 5/A4, CZ-625 00 Brno, Czech Republic

\* To whom correspondence should be addressed

Email: [zbadri@mail.muni.cz](mailto:zbadri@mail.muni.cz), [radek.marek@ceitec.muni.cz](mailto:radek.marek@ceitec.muni.cz)

**Table S1.** The difference in atomic-basin charges induced by complexation,  $\Delta q$ , in atomic units for all three motifs of **3**-H<sub>2</sub>O.

|                                                     | <b>C</b> | <b>N</b> | <b>H<sub>π</sub>*</b> | <b>F</b> | <b>O</b> | <b>H<sub>w</sub>*</b> | <b>water</b> |
|-----------------------------------------------------|----------|----------|-----------------------|----------|----------|-----------------------|--------------|
| <b><i>t</i><sub>1</sub>-<b>3</b>·H<sub>2</sub>O</b> | C1/6     | +0.0074  |                       | -0.0098  | -0.0042  | +0.0156               | +0.0114      |
|                                                     | C2/3/4/5 | +0.0003  |                       | -0.0017  |          |                       |              |
| <b><i>t</i><sub>2</sub>-<b>3</b>·H<sub>2</sub>O</b> | C1       | +0.0074  |                       | -0.0093  | -0.0096  | +0.017                | +0.0074      |
|                                                     | C2       | +0.0026  |                       | -0.0025  |          |                       |              |
|                                                     | C3       | +0.0137  |                       | -0.0045  |          |                       |              |
|                                                     | C4/5/6   | -0.0023  |                       | -0.0026  |          |                       |              |
| <b><i>p</i>-<b>3</b>·H<sub>2</sub>O</b>             | C1/4     | +0.0092  |                       | -0.0036  | -0.0156  | +0.0152               | -0.0004      |
|                                                     | C2/3/5/6 | +0.0035  |                       | -0.0045  |          |                       |              |

\* H<sub>π</sub> and H<sub>w</sub> correspond to hydrogen atoms of the ring and both hydrogen atoms of water molecule, respectively.

**Table S2.** The magnitude of atomic charges of atoms in the complex in atomic unit.

|                                              |          | <b>C</b> | <b>N</b> | <b>H<sub>π</sub>*</b> | <b>F</b> | <b>O</b> | <b>H<sub>w</sub>*</b> |
|----------------------------------------------|----------|----------|----------|-----------------------|----------|----------|-----------------------|
| <b>1·H<sub>2</sub>O</b>                      | C1       | +1.1514  |          | +0.1762               |          | -1.2145  | +0.6102               |
|                                              | C3/4     | +0.4391  |          | +0.1481               |          |          |                       |
|                                              | N2/5     |          | -1.2533  | +0.4991               |          |          |                       |
| <b>2·H<sub>2</sub>O</b>                      | C1/2     | +1.0917  |          | +0.0772               |          | -1.1948  | +0.5986               |
|                                              | N6/7     |          | -0.5794  |                       |          |          |                       |
|                                              | N8/9     |          | -0.5909  |                       |          |          |                       |
| <b><i>p</i>-3·H<sub>2</sub>O</b>             | C1/4     | +0.6815  |          |                       | -0.6754  | -1.1939  | +0.5967               |
|                                              | C2/3/5/6 | +0.6743  |          |                       | -0.6759  |          |                       |
| <b><i>t</i><sub>1</sub>-3·H<sub>2</sub>O</b> | C1/6     | +0.6785  |          |                       | -0.6812  | -1.1810  | +0.5962               |
|                                              | C2/3/4/5 | +0.6731  |          |                       | -0.6741  |          |                       |
| <b><i>t</i><sub>2</sub>-3·H<sub>2</sub>O</b> | C1       | +0.6759  |          |                       | -0.6804  | -1.1888  | +0.5981               |
|                                              | C2       | +0.6756  |          |                       | -0.6746  |          |                       |
|                                              | C3       | +0.6887  |          |                       | -0.6772  |          |                       |
|                                              | C4/5/6   | +0.6692  |          |                       | -0.6747  |          |                       |
| <b>4·H<sub>2</sub>O</b>                      | C1/2     | +1.8937  |          |                       | -0.6881  | -1.1983  | +0.6023               |
|                                              | C3       | +1.8872  |          |                       | -0.6875  |          |                       |
|                                              | N10/12   | -1.2043  |          |                       |          |          |                       |
|                                              | N11      | -1.2096  |          |                       |          |          |                       |
| <b>5·H<sub>2</sub>O</b>                      | C(H)     | +0.0880  |          | +0.0984               |          | -1.2014  | +0.6011               |
|                                              | C(CN)**  | +0.1126  |          |                       |          |          |                       |
|                                              | (C)-CN** | +0.9511  |          |                       |          |          |                       |
|                                              | (C)-CN** |          | -1.1562  |                       |          |          |                       |

\* H<sub>π</sub> and H<sub>w</sub> correspond to hydrogen atom of the ring and hydrogen atom of water molecule, respectively.

\*\* The bold font in C-CN corresponds to the particular atom which its property has been reported.

**Table S3.** Inter-atomic interaction energy, contributions of inter-atomic exchange-correlation energy, electrostatic contribution, and delocalization index as well as primary ( $E_{int}^{prim}$ ), secondary ( $E_{int}^{sec}$ ) and fragment-based ( $E_{int}^{Tot}$ ) for complexes  $t_1\text{-}\mathbf{3}\cdot\text{H}_2\text{O}$  and  $t_2\text{-}\mathbf{3}\cdot\text{H}_2\text{O}$ . Energy in kcal·mol<sup>-1</sup> and DI in au.

|                                                                  | <b>A...B</b>              | <b><math>E_{inter-atomic}</math></b> | <b><math>E_{XC}</math></b> | <b><math>E_{CI}</math></b> | <b>DI</b>     |
|------------------------------------------------------------------|---------------------------|--------------------------------------|----------------------------|----------------------------|---------------|
| <b><math>t_1\text{-}\mathbf{3}\cdot\text{H}_2\text{O}</math></b> | O...C1/6                  | -92.2                                | -2.8                       | -89.4                      | 0.0272        |
|                                                                  | O...C2/5                  | -63.1                                | -0.2                       | -62.9                      | 0.0038        |
|                                                                  | O...C3/4                  | -51.0                                | -0.1                       | -51.0                      | 0.0011        |
|                                                                  | $E_{int}^{prim}$          | <b>-412.6</b>                        | <b>-6.2</b>                | <b>-406.4</b>              | <b>0.0642</b> |
|                                                                  | O...F7/12                 | +88.1                                | -4.0                       | +92.1                      | 0.0401        |
|                                                                  | O...F8/11                 | +59.4                                | 0.0                        | +59.4                      | 0.0005        |
|                                                                  | O...F9/10                 | +47.3                                | 0.0                        | +47.3                      | 0.0002        |
|                                                                  | H <sub>W</sub> *... R     | +4.1                                 | -1.3                       | +5.4                       | 0.0139        |
|                                                                  | $E_{int}^{sec}$           | <b>+431.5</b>                        | <b>-9.3</b>                | <b>+409.8</b>              | <b>0.0955</b> |
|                                                                  | $E_{int}^{Tot}$           | <b>-18.9</b>                         | <b>-15.5</b>               | <b>-3.4</b>                | <b>0.1597</b> |
| <b><math>t_2\text{-}\mathbf{3}\cdot\text{H}_2\text{O}</math></b> | O...C1                    | -93.5                                | -3.5                       | -90.0                      | 0.0318        |
|                                                                  | O...C2                    | -66.7                                | -0.5                       | -66.2                      | 0.0063        |
|                                                                  | O...C3                    | -89.2                                | -2.7                       | -86.5                      | 0.0257        |
|                                                                  | O...C4                    | -52.9                                | -0.1                       | -52.8                      | 0.0013        |
|                                                                  | O...C5                    | -61.5                                | -0.2                       | -61.3                      | 0.0038        |
|                                                                  | O...C6                    | -51.4                                | -0.1                       | -51.3                      | 0.0013        |
|                                                                  | $E_{int}^{prim}$          | <b>-415.2</b>                        | <b>-7.1</b>                | <b>-408.1</b>              | <b>0.0702</b> |
|                                                                  | O...F7                    | +88.7                                | -4.5                       | +93.2                      | 0.0414        |
|                                                                  | O...F8                    | +63.2                                | -0.1                       | +63.3                      | 0.0010        |
|                                                                  | O...F9                    | +83.2                                | -2.5                       | +85.7                      | 0.0260        |
|                                                                  | O...F10                   | +49.4                                | 0.0                        | +49.4                      | 0.0002        |
|                                                                  | O...F11                   | +58.1                                | 0.0                        | +58.1                      | 0.0005        |
|                                                                  | O...F12                   | +48.1                                | 0.0                        | +48.1                      | 0.0002        |
|                                                                  | O...F                     | +390.7                               | -7.1                       | +397.8                     | 0.0693        |
|                                                                  | H <sub>W</sub> *... $\pi$ | +386.2                               | -0.2                       | +386.4                     | 0.0027        |
|                                                                  | H <sub>W</sub> *... F     | -380.0                               | -1.0                       | -379.0                     | 0.0103        |
|                                                                  | H <sub>W</sub> *... R     | +6.2                                 | -1.2                       | +7.4                       | 0.0130        |

|                 |        |       |        |        |
|-----------------|--------|-------|--------|--------|
| $E_{int}^{sec}$ | +433.5 | -8.2  | +405.2 | 0.0823 |
| $E_{int}^{Tot}$ | -18.2  | -15.3 | -2.9   | 0.1525 |

---

\* R and  $H_w$  correspond to sum of all atoms of the  $\pi$ -system (lp-acceptor) and hydrogen atoms of water molecule, respectively.

If we compare primary interactions in three  $\mathbf{3}\cdot\text{H}_2\text{O}$  motifs, we notice that in all of them, O... $\pi$  interaction is attractive and the electrostatic contributions are large that are compensated by large repulsive electrostatic contribution due to unfavorable O...F interactions. However,  $p\text{-}\mathbf{3}\cdot\text{H}_2\text{O}$  benefits more from both exchange-correlation and electrostatic contribution in its primary interaction. Moreover, the exchange-correlation contribution varies more compared to the electrostatic contribution by comparing the first motif ( $p\text{-}\mathbf{3}\cdot\text{H}_2\text{O}$ ) with the two tilted motifs. It changes about two times more than electrostatic component. In  $p\text{-}\mathbf{3}\cdot\text{H}_2\text{O}$  structure, the exchange-correlation contribution of O...C interactions are generally larger than those in  $t\text{-}\mathbf{3}\cdot\text{H}_2\text{O}$  structures except for two carbons C1 and C6 in  $t_1\text{-}\mathbf{3}\cdot\text{H}_2\text{O}$  and C1 and C3 in  $t_2\text{-}\mathbf{3}\cdot\text{H}_2\text{O}$  motifs close to the water. It suggests that exchange-correlation contribution is affected more by distance compared to the electrostatic component. Those large attractive electrostatic contributions of primary interaction in all conformers are considerably compensated by the repulsive O...F interactions. As it has pointed out in the previous section, the PES of  $\mathbf{3}\cdot\text{H}_2\text{O}$  is quite flat and all complexes have very close interaction energies; nevertheless the  $t_2\text{-}\mathbf{3}\cdot\text{H}_2\text{O}$  is about 0.3 and 0.2 kcal.mol<sup>-1</sup> more stable than  $p$ - and  $t_1\text{-HFB}\cdot\text{H}_2\text{O}$  complexes. Furthermore,  $t_1\text{-}\mathbf{3}\cdot\text{H}_2\text{O}$  and  $t_2\text{-}\mathbf{3}\cdot\text{H}_2\text{O}$  generally benefit more from the exchange-correlation contribution compared with the  $p\text{-}\mathbf{3}\cdot\text{H}_2\text{O}$ . A close look at the results shows that the large exchange-correlation contribution in the tilt structures mostly originated from O...F interactions. Consequently, if we only consider the primary

interaction which should be considered as a lone pair- $\pi$  interaction, we can suggest more efficient lone pair- $\pi$  interaction for the  $p\text{-}\mathbf{3}\cdot\text{H}_2\text{O}$  structure compared to tilted complexes.
